# Supplementary material for: Peroxynitrite dominates sodium nitroprusside-induced apoptosis in human hepatocellular carcinoma cells
Source: PubMed Central journal article supplement (PMC5444707; doi:10.18632/oncotarget.16164), 2017-03-13
Supplement: oncotarget-08-29833-s001.pdf [file oncotarget-08-29833-s001.pdf]

## Peroxynitrite dominates sodium nitroprusside-induced apoptosis in human hepatocellular carcinoma cells

### Supplementary Materials

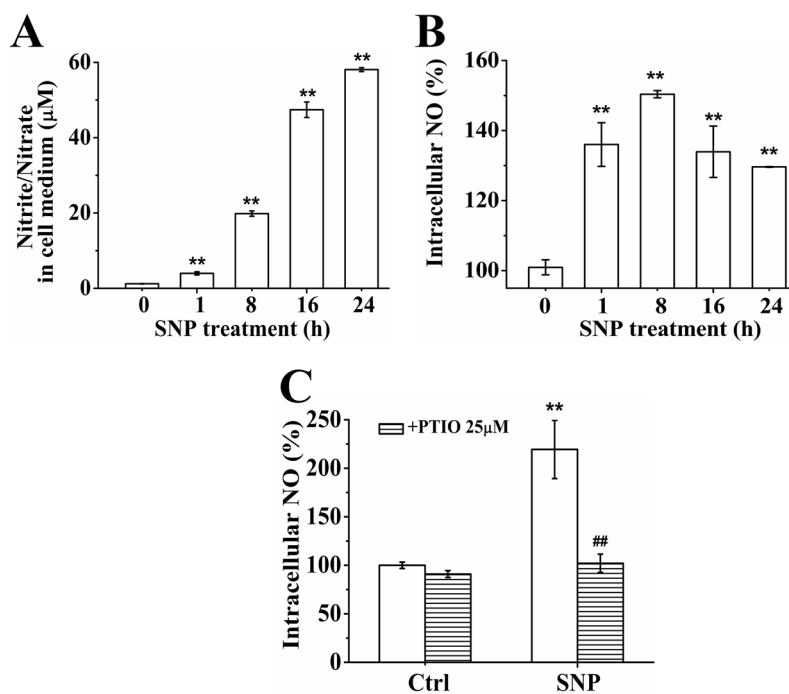

**Supplementary Figure 1: PTIO inhibits SNP-induced NO generation.** (A) SNP induced time-dependent nitrite/nitrate generation in cell medium. (B) SNP induced rapid intracellular NO generation. (C) PTIO pretreatment completely inhibited SNP-induced intracellular NO generation. Those results represent duplicates with three independent experiments. \*\* $P < 0.01$  vs Control. ## $P < 0.01$  vs SNP.

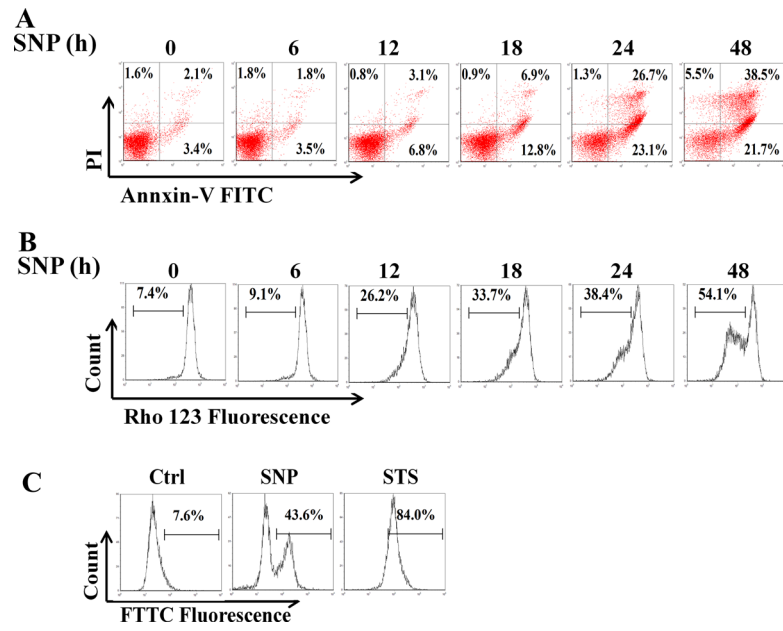

**Supplementary Figure 2: SNP induces apoptosis in HepG2 cells.** (A and B) SNP induced time-dependent apoptosis (A) and loss of  $\Delta\Psi_m$  (B). (C) SNP induced remarkable caspases activation.
